# Supplementary material for: Complete Mitogenome Analysis of Five Leafhopper Species of Idiocerini (Hemiptera: Cicadellidae)
Source: MDPI journal article supplement (doi:10.3390/genes13112000), 2022-11-01

(a) *Nabicerus dentimus*

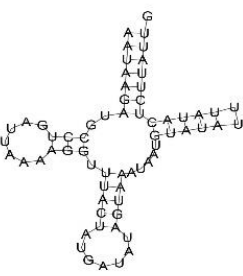

tRNA-I

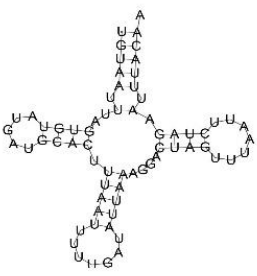

tRNA-Q

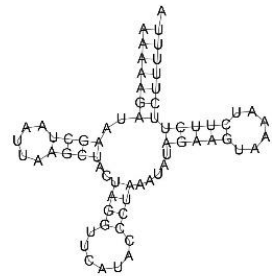

tRNA-M

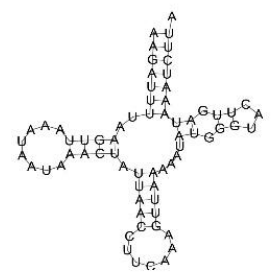

tRNA-W

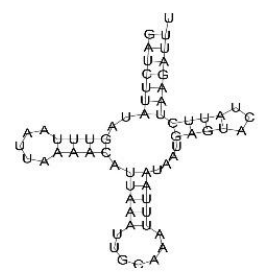

tRNA-C

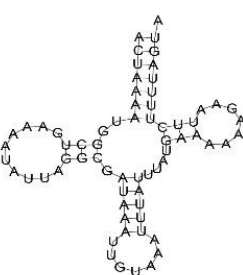

tRNA-Y

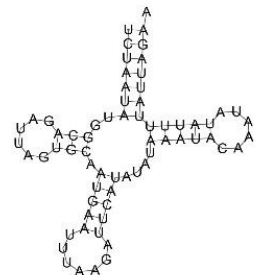

tRNA-L2

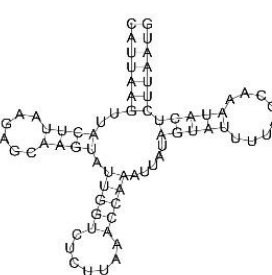

tRNA-K

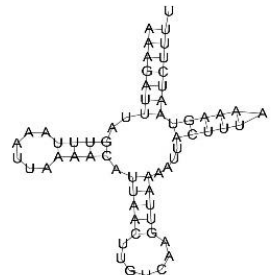

tRNA-D

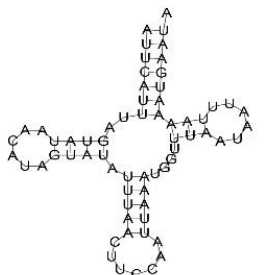

tRNA-G

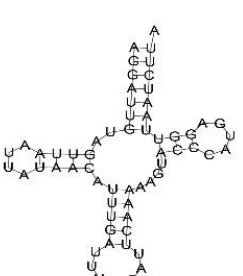

tRNA-A

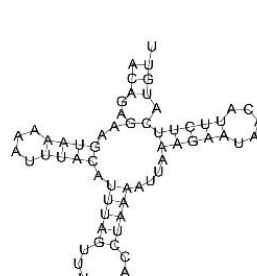

tRNA-R

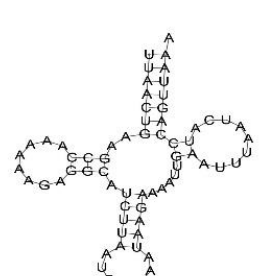

tRNA-N

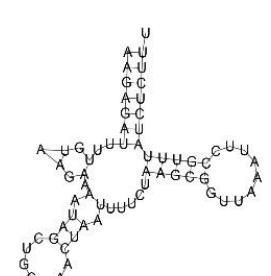

tRNA-S1

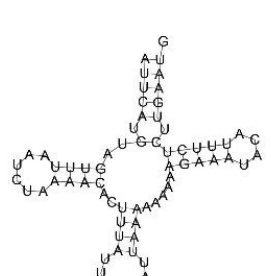

tRNA-E

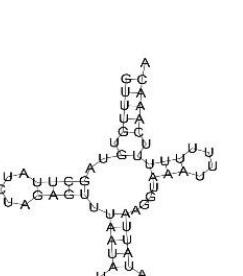

tRNA-F

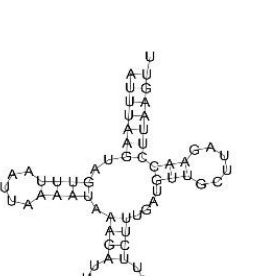

tRNA-H

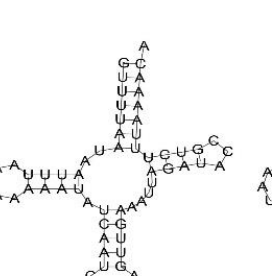

tRNA-T

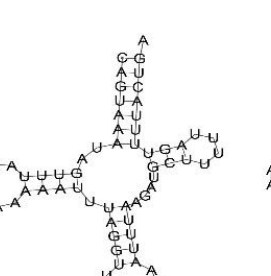

tRNA-P

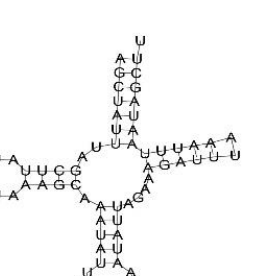

tRNA-S2

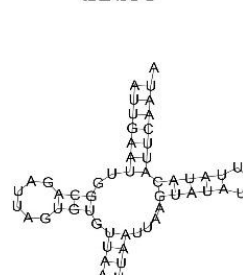

tRNA-L1

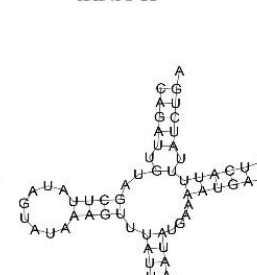

tRNA-V

(b) *Neoamritatus* sp.

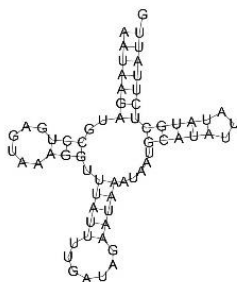

tRNA-I

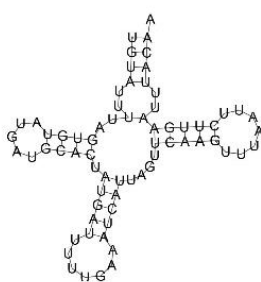

tRNA-Q

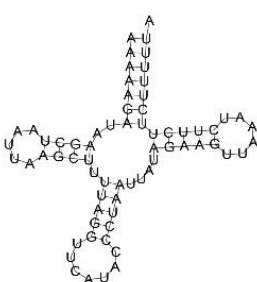

tRNA-M

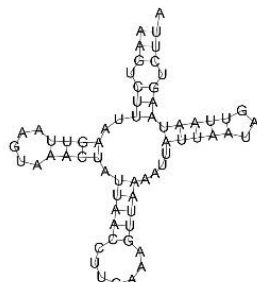

tRNA-W

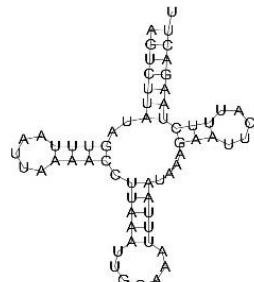

tRNA-C

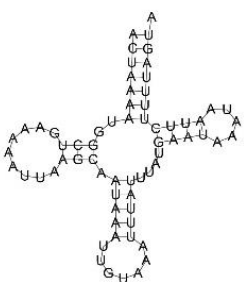

tRNA-Y

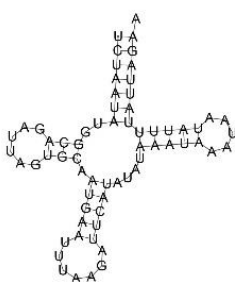

tRNA-L2

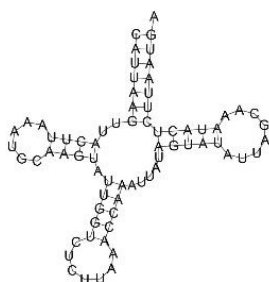

tRNA-K

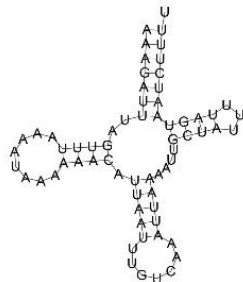

tRNA-D

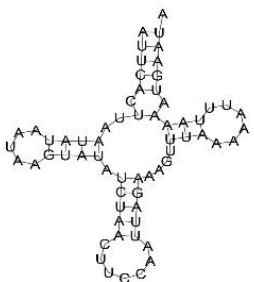

tRNA-G

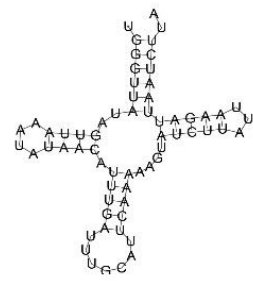

tRNA-A

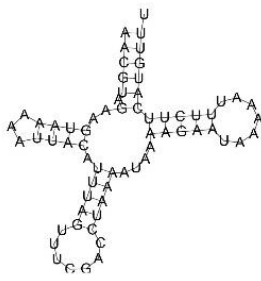

tRNA-R

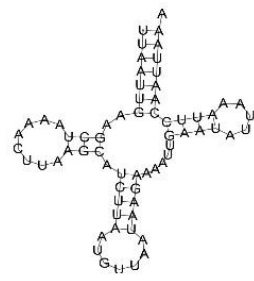

tRNA-N

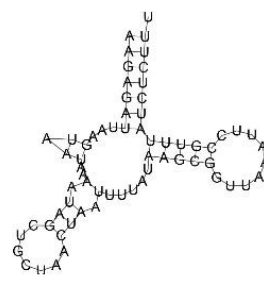

tRNA-S1

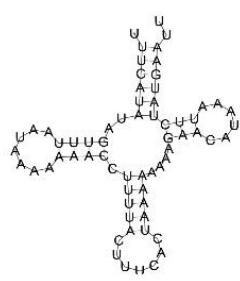

tRNA-E

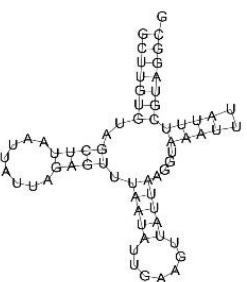

tRNA-F

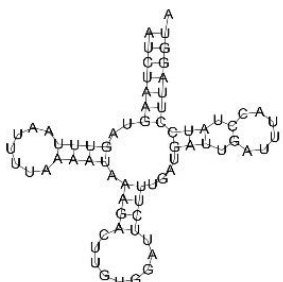

tRNA-H

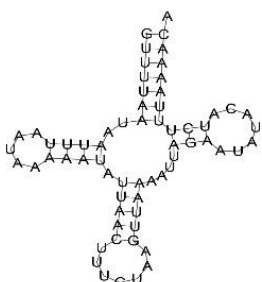

tRNA-T

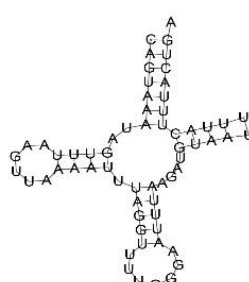

tRNA-P

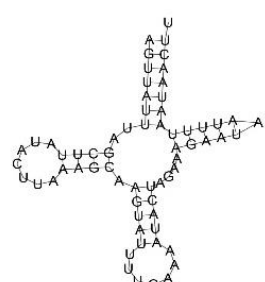

tRNA-S2

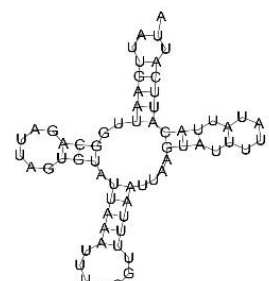

tRNA-L1

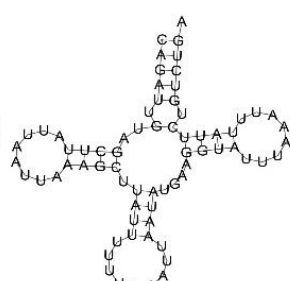

tRNA-V



(d) *Podulmorinus opacus*.

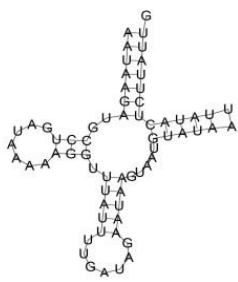

tRNA-I

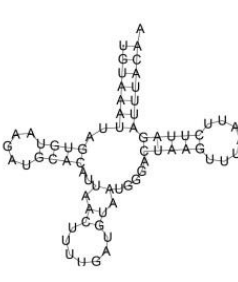

tRNA-C

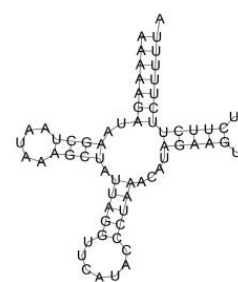

tRNA-M

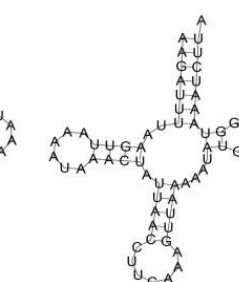

tRNA-V

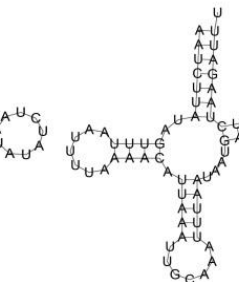tRNA-*C*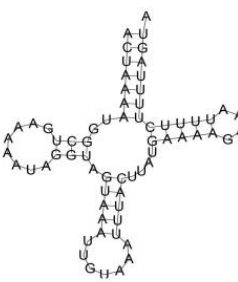

tRNA-

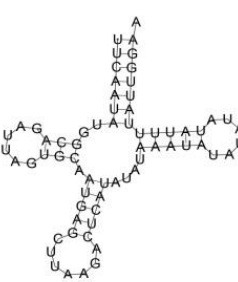

## RNA-L

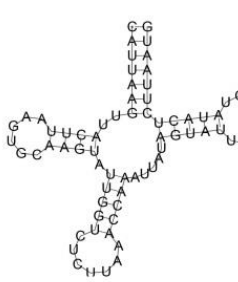

RNA-K

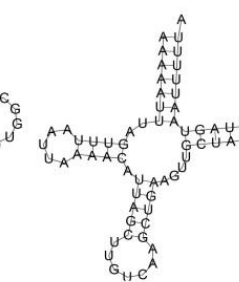

tRNA-D

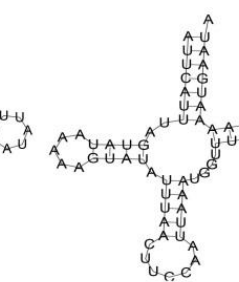

RNA-G

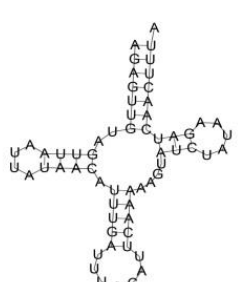

tRNA-

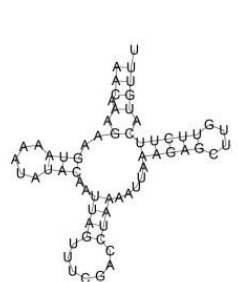

tRNA-

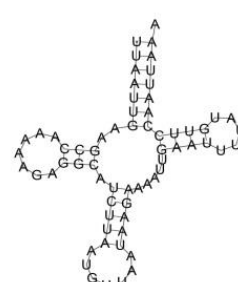

RNA-N

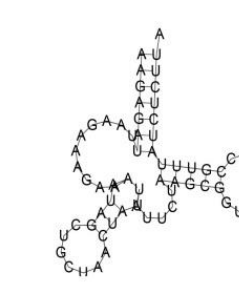

NA-S1

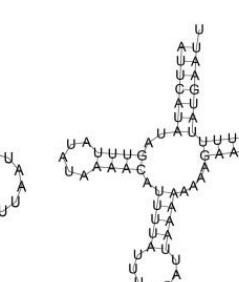

RNA-E

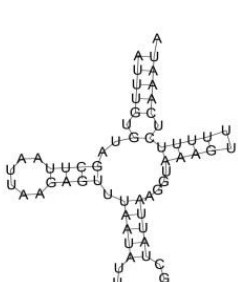

tRNA

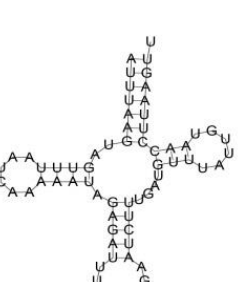

tRNA-1

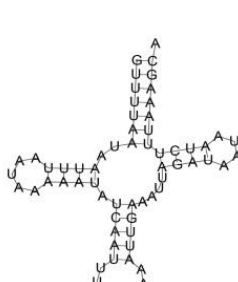

RNA-T

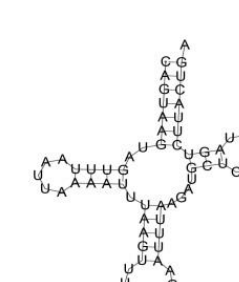

RNA-P

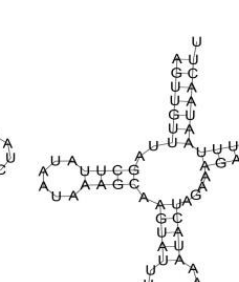

RNA-S2

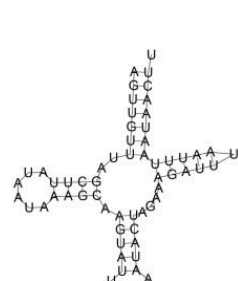

tRNA-

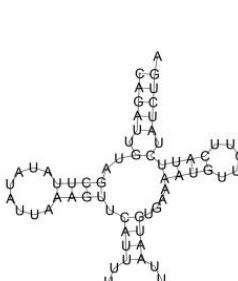

tRNA

(e) *Podulmorinus consimilis*.

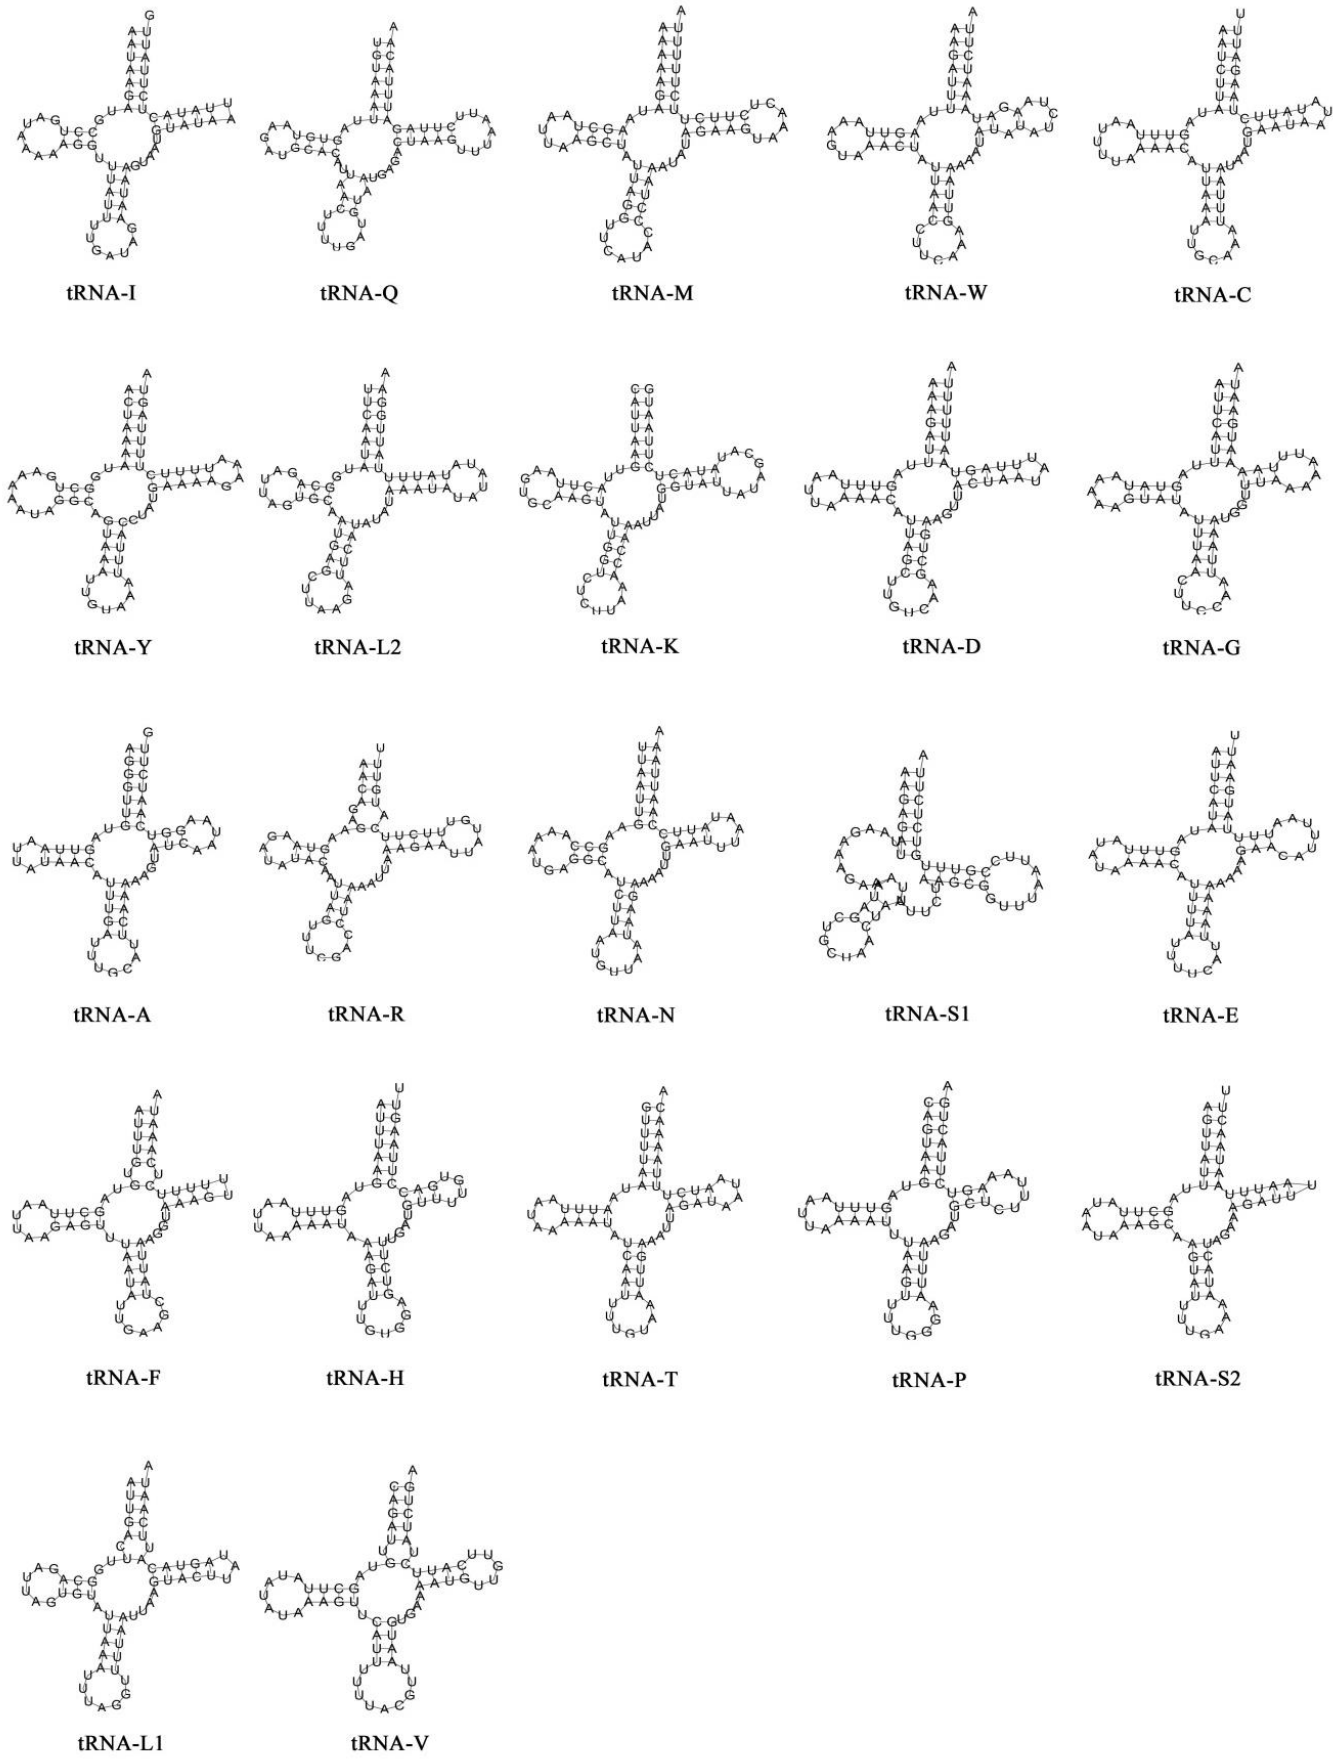

Supplement: s1 [file s1]
