# Supplementary material for: Complete Mitogenome Analysis of Five Leafhopper Species of Idiocerini (Hemiptera: Cicadellidae)
Source: MDPI journal article supplement (doi:10.3390/genes13112000), 2022-11-01
Supplement: s1 [file s1]

**Table S2.** Best-fit models and partitioning schemes selected by PartitionFinder 2

| Partition names          | Subset                             | sites | Best Model |
|--------------------------|------------------------------------|-------|------------|
| <i>atp6</i>              | 1-654                              | 654   | GTR+I+G    |
| <i>atp8, nad6, nad3d</i> | 655-804; 11002-11493;<br>7000-7353 | 996   | GTR+I+G    |
| <i>cox1</i>              | 805-2340                           | 1536  | TIM+I+G    |
| <i>cox2, cox3</i>        | 2341-3018; 3019-3795               | 1455  | TIM+I+G    |
| <i>cob</i>               | 3796-5091                          | 1296  | GTR+G      |
| <i>nad1</i>              | 5092-6027                          | 936   | TVM+I+G    |
| <i>nad2</i>              | 6028-6999                          | 972   | TVM+I+G    |
| <i>nad4l</i>             | 7354-7782                          | 429   | GTR+I+G    |
| <i>nad4</i>              | 7783-9120                          | 1338  | TVM+I+G    |
| <i>nad5</i>              | 9121-11001                         | 1881  | GTR+G      |
