# Supplementary material for: Complete Mitogenome Analysis of Five Leafhopper Species of Idiocerini (Hemiptera: Cicadellidae)
Source: MDPI journal article supplement (doi:10.3390/genes13112000), 2022-11-01
Supplement: s1 [file s1]

**Table S3.** List of complete mitogenomes of leafhoppers in the family Cicadellidae retrieved from GenBank

| Organism                            | Family       | Genus                 | Length (bp) | GenBank accession number |
|-------------------------------------|--------------|-----------------------|-------------|--------------------------|
| <i>Abrus daozenensis</i>            | Cicadellidae | <i>Abrus</i>          | 16391       | MZ274046                 |
| <i>Abrus expansivus</i>             | Cicadellidae | <i>Abrus</i>          | 15904       | MK033020                 |
| <i>Abrus yunshanensis</i>           | Cicadellidae | <i>Abrus</i>          | 16298       | MZ274047                 |
| <i>Aconurella prolixa</i>           | Cicadellidae | <i>Aconurella</i>     | 15222       | MZ433366                 |
| <i>Agnesiella kamala</i>            | Cicadellidae | <i>Agnesiella</i>     | 15209       | MZ457327                 |
| <i>Agnesiella Roxana</i>            | Cicadellidae | <i>Agnesiella</i>     | 15901       | MZ457328                 |
| <i>Aguriahana digitate</i>          | Cicadellidae | <i>Aguriahana</i>     | 15854       | MZ457330                 |
| <i>Alebroides salicis</i>           | Cicadellidae | <i>Alebroides</i>     | 15890       | MZ014449                 |
| <i>Atkinsoniella curvata</i>        | Cicadellidae | <i>Atkinsoniella</i>  | 15988       | OL677864                 |
| <i>Atkinsoniella flavipenna</i>     | Cicadellidae | <i>Atkinsoniella</i>  | 15671       | OL677865                 |
| <i>Atkinsoniella grahami</i>        | Cicadellidae | <i>Atkinsoniella</i>  | 15621       | MW533712                 |
| <i>Atkinsoniella heiyuana</i>       | Cicadellidae | <i>Atkinsoniella</i>  | 16368       | MG813482                 |
| <i>Atkinsoniella longiuscula</i>    | Cicadellidae | <i>Atkinsoniella</i>  | 15815       | OL677866                 |
| <i>Atkinsoniella nigrita</i>        | Cicadellidae | <i>Atkinsoniella</i>  | 16011       | ON009029                 |
| <i>Atkinsoniella thalia</i>         | Cicadellidae | <i>Atkinsoniella</i>  | 15034       | OL677867                 |
| <i>Atkinsoniella thaloidea</i>      | Cicadellidae | <i>Atkinsoniella</i>  | 15571       | OL677868                 |
| <i>Atkinsoniella tiani</i>          | Cicadellidae | <i>Atkinsoniella</i>  | 15841       | OL677869                 |
| <i>Atkinsoniella uniguttata</i>     | Cicadellidae | <i>Atkinsoniella</i>  | 15784       | OL677870                 |
| <i>Atkinsoniella warpa</i>          | Cicadellidae | <i>Atkinsoniella</i>  | 15852       | OL677871                 |
| <i>Atkinsoniella wui</i>            | Cicadellidae | <i>Atkinsoniella</i>  | 15159       | OL677872                 |
| <i>Atkinsoniella xanthonota</i>     | Cicadellidae | <i>Atkinsoniella</i>  | 15472       | MT596736                 |
| <i>Atkinsoniella yunnanana</i>      | Cicadellidae | <i>Atkinsoniella</i>  | 15875       | OL677874                 |
| <i>Atkinsoniella zizhongii</i>      | Cicadellidae | <i>Atkinsoniella</i>  | 16483       | ON457601                 |
| <i>Balala fujiana</i>               | Cicadellidae | <i>Balala</i>         | 16221       | MW218661                 |
| <i>Balala lui</i>                   | Cicadellidae | <i>Balala</i>         | 15558       | MG813488                 |
| <i>Batracomorphus lateprocessus</i> | Cicadellidae | <i>Batracomorphus</i> | 15356       | MG813489                 |
| <i>Bolanusoides shaanxiensis</i>    | Cicadellidae | <i>Bolanusoides</i>   | 15274       | MN661136                 |
| <i>Bothrogonia ferruginea</i>       | Cicadellidae | <i>Bothrogonia</i>    | 15262       | KU167550                 |
| <i>Bothrogonia qiongana</i>         | Cicadellidae | <i>Bothrogonia</i>    | 15788       | MT500855                 |
| <i>Bothrogonia shuana</i>           | Cicadellidae | <i>Bothrogonia</i>    | 15229       | MT500856                 |
| <i>Bothrogonia tongmaiana</i>       | Cicadellidae | <i>Bothrogonia</i>    | 15539       | MT500857                 |
| <i>Bothrogonia yunana</i>           | Cicadellidae | <i>Bothrogonia</i>    | 15585       | MT500858                 |
| <i>Carinata rufipenna</i>           | Cicadellidae | <i>Carinata</i>       | 15261       | MN227165                 |
| <i>Cassianeura bimaculata</i>       | Cicadellidae | <i>Cassianeura</i>    | 14597       | MT985381                 |
| <i>Cassianeura cassiae</i>          | Cicadellidae | <i>Cassianeura</i>    | 15423       | MT985380                 |
| <i>Changbaninus pleiospicules</i>   | Cicadellidae | <i>Changbaninus</i>   | 15527       | MT332317                 |
| <i>Chudania hellerina</i>           | Cicadellidae | <i>Chudania</i>       | 15044       | MN227164                 |
| <i>Cicadella viridis</i>            | Cicadellidae | <i>Cicadella</i>      | 15891       | MK335936                 |
| <i>Cofana yasumatsui</i>            | Cicadellidae | <i>Cofana</i>         | 15019       | MN793964                 |
| <i>Concaveplana rufolineata</i>     | Cicadellidae | <i>Concaveplana</i>   | 15240       | MN227168                 |
| <i>Dikraneura zlata</i>             | Cicadellidae | <i>Dikraneura</i>     | 15330       | MZ014450                 |
| <i>Dikraneurini</i> sp. SL-2021a    | Cicadellidae | <i>Dikraneurini</i>   | 15306       | MZ014451                 |
| <i>Doratura homophyla</i>           | Cicadellidae | <i>Doratura</i>       | 16269       | OK105076                 |
| <i>Doratura stylata</i>             | Cicadellidae | <i>Doratura</i>       | 16054       | OK105077                 |
| <i>Drabescoides nuchalis</i>        | Cicadellidae | <i>Drabescoides</i>   | 15309       | KR349344                 |
| <i>Drabescus ineffectus</i>         | Cicadellidae | <i>Drabescus</i>      | 15744       | MT527188                 |
| <i>Durgades nigropicta</i>          | Cicadellidae | <i>Durgades</i>       | 15974       | KY123686                 |
| <i>Elbelus tripunctatus</i>         | Cicadellidae | <i>Elbelus</i>        | 15308       | MZ014452                 |
| <i>Empoasca serrata</i>             | Cicadellidae | <i>Empoasca</i>       | 15131       | MZ014453                 |
| <i>Empoasca vitis</i>               | Cicadellidae | <i>Empoasca</i>       | 15154       | MG813494                 |
| <i>Empoascaanara dwalata</i>        | Cicadellidae | <i>Empoascaanara</i>  | 15271       | MT350235                 |
| <i>Empoascaanara gracilis</i>       | Cicadellidae | <i>Empoascaanara</i>  | 14627       | MT576649                 |
| <i>Empoascaanara sipra</i>          | Cicadellidae | <i>Empoascaanara</i>  | 14827       | MN604278                 |
| <i>Empoascaanara wengangensis</i>   | Cicadellidae | <i>Empoascaanara</i>  | 14830       | MT445764                 |
| <i>Eupteryx adspersa</i>            | Cicadellidae | <i>Eupteryx</i>       | 15178       | MZ014454                 |
| <i>Eupteryx gracilirama</i>         | Cicadellidae | <i>Eupteryx</i>       | 17173       | MT594485                 |

|                                    |              |                      |       |           |
|------------------------------------|--------------|----------------------|-------|-----------|
| <i>Eupteryx minuscula</i>          | Cicadellidae | <i>Eupteryx</i>      | 16944 | MN910279  |
| <i>Eurhadina acapitata</i>         | Cicadellidae | <i>Eurhadina</i>     | 15419 | MZ457331  |
| <i>Eurhadina dongwolensis</i>      | Cicadellidae | <i>Eurhadina</i>     | 15708 | MZ457332  |
| <i>Eurhadina fusca</i>             | Cicadellidae | <i>Eurhadina</i>     | 15302 | MZ983367  |
| <i>Eurhadina jarraji</i>           | Cicadellidae | <i>Eurhadina</i>     | 15332 | MZ014455  |
| <i>Evacanthus acuminatus</i>       | Cicadellidae | <i>Evacanthus</i>    | 14793 | MK948205  |
| <i>Evacanthus danmainus</i>        | Cicadellidae | <i>Evacanthus</i>    | 15343 | MN227166  |
| <i>Evacanthus heimianus</i>        | Cicadellidae | <i>Evacanthus</i>    | 15806 | MG813486  |
| <i>Exitianus nanus</i>             | Cicadellidae | <i>Exitianus</i>     | 15714 | OK105078  |
| <i>Fieberiella septentrionalis</i> | Cicadellidae | <i>Fieberiella</i>   | 16175 | MW078430  |
| <i>Ghauriana sinensis</i>          | Cicadellidae | <i>Ghauriana</i>     | 15491 | MN699874  |
| <i>Gunungidia aurantifasciata</i>  | Cicadellidae | <i>Gunungidia</i>    | 15669 | MT622821  |
| <i>Hylica paradoxa</i>             | Cicadellidae | <i>Hylica</i>        | 14762 | MW218660  |
| <i>Idiocerus herrichii</i>         | Cicadellidae | <i>Idiocerus</i>     | 15489 | MN935487  |
| <i>Idiocerus salicis</i>           | Cicadellidae | <i>Idiocerus</i>     | 16436 | MG813490  |
| <i>Idioscopus clypealis</i>        | Cicadellidae | <i>Idioscopus</i>    | 15393 | NC_039642 |
| <i>Idioscopus nitidulus</i>        | Cicadellidae | <i>Idioscopus</i>    | 15287 | NC_029203 |
| <i>Jacobiasca formosana</i>        | Cicadellidae | <i>Jacobiasca</i>    | 16353 | MW429482  |
| <i>Japanagallia spinosa</i>        | Cicadellidae | <i>Japanagallia</i>  | 15655 | KY123687  |
| <i>Japananus hyalinus</i>          | Cicadellidae | <i>Japananus</i>     | 15364 | KY129954  |
| <i>Kalasha nativa</i>              | Cicadellidae | <i>Kalasha</i>       | 15716 | MW218662  |
| <i>Kaukania anser</i>              | Cicadellidae | <i>Kaukania</i>      | 15345 | MZ014456  |
| <i>Kolla paulula</i>               | Cicadellidae | <i>Kolla</i>         | 14995 | MW542170  |
| <i>Koreocerus koreanus</i>         | Cicadellidae | <i>Koreocerus</i>    | 15594 | MW916101  |
| <i>Krisna concava</i>              | Cicadellidae | <i>Krisna</i>        | 14304 | MN577635  |
| <i>Krisna rufimarginata</i>        | Cicadellidae | <i>Krisna</i>        | 14724 | MN577636  |
| <i>Kusala populi</i>               | Cicadellidae | <i>Kusala</i>        | 15402 | OM066070  |
| <i>Ledra auditura</i>              | Cicadellidae | <i>Ledra</i>         | 16094 | MK387845  |
| <i>Ledra trigona</i>               | Cicadellidae | <i>Ledra</i>         | 16094 | MG813491  |
| <i>Limassolla emmrichi</i>         | Cicadellidae | <i>Limassolla</i>    | 14677 | MW272458  |
| <i>Limassolla lingchuanensis</i>   | Cicadellidae | <i>Limassolla</i>    | 15716 | MN605256  |
| <i>Limassolla</i> sp. XZ-2020      | Cicadellidae | <i>Limassolla</i>    | 17053 | MT683892  |
| <i>Macropsis notata</i>            | Cicadellidae | <i>Macropsis</i>     | 16323 | KX010420  |
| <i>Macrosteles quadrilineatus</i>  | Cicadellidae | <i>Macrosteles</i>   | 16626 | KY645960  |
| <i>Macrosteles quadrimaculatus</i> | Cicadellidae | <i>Macrosteles</i>   | 15734 | MG727894  |
| <i>Maestas dorsalis</i>            | Cicadellidae | <i>Maestas</i>       | 15352 | KX786285  |
| <i>Matsumurasca onukii</i>         | Cicadellidae | <i>Matsumurasca</i>  | 15167 | MG190360  |
| <i>Membranacea stenoprocessa</i>   | Cicadellidae | <i>Membranacea</i>   | 14717 | MW426467  |
| <i>Mesargus serrata</i>            | Cicadellidae | <i>Mesargus</i>      | 15399 | MG813495  |
| <i>Metidiocerus impressifrons</i>  | Cicadellidae | <i>Metidiocerus</i>  | 16426 | MW963341  |
| <i>Metidiocerus</i> sp.            | Cicadellidae | <i>Metidiocerus</i>  | 15079 | MT554451  |
| <i>Michalowskiya breviprocessa</i> | Cicadellidae | <i>Michalowskiya</i> | 15591 | MW264489  |
| <i>Mileewa albovitata</i>          | Cicadellidae | <i>Mileewa</i>       | 15079 | MK138358  |
| <i>Mileewa margheritae</i>         | Cicadellidae | <i>Mileewa</i>       | 15375 | MT483998  |
| <i>Mileewa ponta</i>               | Cicadellidae | <i>Mileewa</i>       | 15999 | MT497465  |
| <i>Mileewa rufivena</i>            | Cicadellidae | <i>Mileewa</i>       | 15837 | MZ326689  |
| <i>Mimotettix multispinosus</i>    | Cicadellidae | <i>Mimotettix</i>    | 15754 | MT332321  |
| <i>Mitjaevia bifurcata</i>         | Cicadellidae | <i>Mitjaevia</i>     | 16813 | OK448488  |
| <i>Mitjaevia diana</i>             | Cicadellidae | <i>Mitjaevia</i>     | 16589 | OK448489  |
| <i>Mitjaevia dworakowskiae</i>     | Cicadellidae | <i>Mitjaevia</i>     | 16399 | MT981880  |
| <i>Mitjaevia protuberanta</i>      | Cicadellidae | <i>Mitjaevia</i>     | 15472 | MN627216  |
| <i>Mitjaevia shibingensis</i>      | Cicadellidae | <i>Mitjaevia</i>     | 15788 | MT981879  |
| <i>Mukaria splendida</i>           | Cicadellidae | <i>Mukaria</i>       | 16711 | MG813485  |
| <i>Nacolus tuberculatus</i>        | Cicadellidae | <i>Nacolus</i>       | 15737 | MW218663  |
| <i>Nephotettix cincticeps</i>      | Cicadellidae | <i>Nephotettix</i>   | 14805 | KP749836  |
| <i>Nephotettix malayanus</i>       | Cicadellidae | <i>Nephotettix</i>   | 15462 | OK105079  |
| <i>Nephotettix nigropictus</i>     | Cicadellidae | <i>Nephotettix</i>   | 15280 | OK105080  |
| <i>Nephotettix virescens</i>       | Cicadellidae | <i>Nephotettix</i>   | 15810 | OK105081  |
| <i>Nesophrosyne haleakala</i>      | Cicadellidae | <i>Nesophrosyne</i>  | 15513 | ON135509  |
| <i>Nesophrosyne kanawao</i>        | Cicadellidae | <i>Nesophrosyne</i>  | 15178 | ON135519  |

|                                         |              |                          |       |          |
|-----------------------------------------|--------------|--------------------------|-------|----------|
| <i>Nesophrosyne makaihe</i>             | Cicadellidae | <i>Nesophrosyne</i>      | 15679 | ON135524 |
| <i>Nesophrosyne maritima</i>            | Cicadellidae | <i>Nesophrosyne</i>      | 15579 | ON135520 |
| <i>Nesophrosyne montium</i>             | Cicadellidae | <i>Nesophrosyne</i>      | 15194 | ON135508 |
| <i>Nesophrosyne ogradyi</i>             | Cicadellidae | <i>Nesophrosyne</i>      | 16349 | ON135505 |
| <i>Nesophrosyne ponapona</i>            | Cicadellidae | <i>Nesophrosyne</i>      | 15138 | ON135522 |
| <i>Nesophrosyne</i> sp. 246<br>GMB-2012 | Cicadellidae | <i>Nesophrosyne</i>      | 15051 | ON135521 |
| <i>Olidiana longisticka</i>             | Cicadellidae | <i>Olidiana</i>          | 15993 | MN780582 |
| <i>Olidiana obliquea</i>                | Cicadellidae | <i>Olidiana</i>          | 15312 | MN780583 |
| <i>Olidiana ritcheri</i>                | Cicadellidae | <i>Olidiana</i>          | 15372 | MN780584 |
| <i>Olidiana ritcheriina</i>             | Cicadellidae | <i>Olidiana</i>          | 15205 | MN780581 |
| <i>Olidiana tongmaiensis</i>            | Cicadellidae | <i>Olidiana</i>          | 15363 | MN780585 |
| <i>Oncopsis nigrofasciata</i>           | Cicadellidae | <i>Oncopsis</i>          | 15927 | MG813492 |
| <i>Orosius</i> sp.                      | Cicadellidae | <i>Orosius</i>           | 15374 | ON135523 |
| <i>Paraahimia luodianensis</i>          | Cicadellidae | <i>Paraahimia</i>        | 16497 | MN901449 |
| <i>Paradorydium reflexanum</i>          | Cicadellidae | <i>Paradorydium</i>      | 15661 | MG813487 |
| <i>Paralaevicephalus gracilipenis</i>   | Cicadellidae | <i>Paralaevicephalus</i> | 16114 | MK450366 |
| <i>Paramacrosteles nigromaculatus</i>   | Cicadellidae | <i>Paramacrosteles</i>   | 15011 | MK234840 |
| <i>Parascaphoidella transversa</i>      | Cicadellidae | <i>Parascaphoidella</i>  | 16011 | MT332318 |
| <i>Parathailocyba orla</i>              | Cicadellidae | <i>Parathailocyba</i>    | 15382 | MN894531 |
| <i>Parocerus laurifoliae</i>            | Cicadellidae | <i>Idiocerus</i>         | 16811 | MH433622 |
| <i>Penthimia melanocephala</i>          | Cicadellidae | <i>Penthimia</i>         | 15308 | MT768010 |
| <i>Petalocephala chlorophana</i>        | Cicadellidae | <i>Petalocephala</i>     | 14927 | MT610899 |
| <i>Petalocephala eurglobata</i>         | Cicadellidae | <i>Petalocephala</i>     | 14834 | MW018817 |
| <i>Petalocephala gongshanensis</i>      | Cicadellidae | <i>Petalocephala</i>     | 14969 | MW018818 |
| <i>Phlogotettix cyclops</i>             | Cicadellidae | <i>Phlogotettix</i>      | 15078 | MT332320 |
| <i>Phlogotettix monozoneus</i>          | Cicadellidae | <i>Phlogotettix</i>      | 15201 | MT332315 |
| <i>Phlogothamnus polymaculatus</i>      | Cicadellidae | <i>Phlogothamnus</i>     | 14905 | MT332322 |
| <i>Populicerus confusus</i>             | Cicadellidae | <i>Populicerus</i>       | 16395 | MT341642 |
| <i>Populicerus populi</i>               | Cicadellidae | <i>Populicerus</i>       | 16494 | MH492318 |
| <i>Reticuluma hamata</i>                | Cicadellidae | <i>Reticuluma</i>        | 15190 | MN922303 |
| <i>Roxasellana stellata</i>             | Cicadellidae | <i>Roxasellana</i>       | 15361 | MT527187 |
| <i>Scaphoideus maai</i>                 | Cicadellidae | <i>Scaphoideus</i>       | 15188 | KY817243 |
| <i>Scaphoideus maculatus</i>            | Cicadellidae | <i>Scaphoideus</i>       | 15486 | MT332316 |
| <i>Scaphoideus nigrivalveus</i>         | Cicadellidae | <i>Scaphoideus</i>       | 15235 | KY817244 |
| <i>Scaphoideus varius</i>               | Cicadellidae | <i>Scaphoideus</i>       | 15207 | KY817245 |
| <i>Signoretia aureola</i>               | Cicadellidae | <i>Signoretia</i>        | 15547 | MG813493 |
| <i>Taharana fasciana</i>                | Cicadellidae | <i>Taharana</i>          | 15161 | KY886913 |
| <i>Tituria pyramidata</i>               | Cicadellidae | <i>Tituria</i>           | 15331 | MN920440 |
| <i>Tituria sagittata</i>                | Cicadellidae | <i>Tituria</i>           | 14918 | MT610900 |
| <i>Trifida elongata</i>                 | Cicadellidae | <i>Trifida</i>           | 14924 | MT153579 |
| <i>Trocnadella arisana</i>              | Cicadellidae | <i>Trocnadella</i>       | 15131 | KU748516 |
| <i>Ujna puerana</i>                     | Cicadellidae | <i>Ujna</i>              | 14838 | MZ326688 |
| <i>Yangisunda tiani</i>                 | Cicadellidae | <i>Yangisunda</i>        | 15190 | MZ014459 |
| <i>Yanocephalus yanonis</i>             | Cicadellidae | <i>Yanocephalus</i>      | 15623 | KY039113 |
| <i>Ziczacella heptapotamica</i>         | Cicadellidae | <i>Ziczacella</i>        | 15334 | OM066071 |
| <i>Zyginella minuta</i>                 | Cicadellidae | <i>Zyginella</i>         | 15544 | MT488436 |
