# Supplementary material for: Complete Mitogenome Analysis of Five Leafhopper Species of Idiocerini (Hemiptera: Cicadellidae)
Source: MDPI journal article supplement (doi:10.3390/genes13112000), 2022-11-01
Supplement: s1 [file s1]

Table S4 Tandem repeats in the mitochondrial control region of 14 species in the tribe Idiocerini

(1) *Idiocerus herrichii*

| Unit | Position |     | Length<br>(bp) | Copy<br>number | 5'–3' motif sequence        |
|------|----------|-----|----------------|----------------|-----------------------------|
|      | From     | To  |                |                |                             |
| TR1  | 89       | 159 | 27             | 2.6            | AAATTTATATAAAATAATTTTAAACAA |
| TR2  | 173      | 210 | 20             | 2.0            | TTAAATTAAATAATAAATAT        |
| TR3  | 550      | 740 | 18             | 10.1           | ATATAATTAATAATAATA          |

(2) *Populicerus confusus*

| Unit | Position |      | Length<br>(bp) | Copy number | 5'–3' motif sequence                                                              |
|------|----------|------|----------------|-------------|-----------------------------------------------------------------------------------|
|      | From     | To   |                |             |                                                                                   |
| TR1  | 60       | 309  | 80             | 3.1         | TTTAAATAATTTGACTTAGTAGGGGCTAAGTAATTATAAAATTTATGAAATGAATGGTTACTAACTAATTGAATTTCTAAT |
| TR2  | 433      | 816  | 80             | 4.8         | TAAGTAATTATAAAATTTATGAAATGAATGGTTACTAACTAATTGAATTTCTAATTTTAAATAATTTGACTTAGTAGGGGC |
| TR3  | 939      | 1242 | 80             | 3.8         | TAAGTAATTATAAAATTTATGAAATGAATGGTTACTAACTAATTGAATTTCTAATTTTAAATAATTTGACTTAGTAGGGGC |
| TR4  | 1770     | 1835 | 18             | 3.7         | ATTAATTAATTATATAGT                                                                |
| TR5  | 1899     | 1950 | 17             | 3.4         | ATATATTAATTATATAT                                                                 |

(3) *Metidiocerus sp.*

| Unit | Position |     | Length<br>(bp) | Copy numbe | 5'–3' motif sequence  |
|------|----------|-----|----------------|------------|-----------------------|
|      | From     | To  |                |            |                       |
| TR1  | 377      | 426 | 21             | 2.5        | TATATTAATATAGTAAATAAA |

(4) *Rhytidodus viridiflavus*

| Unit | Position |      | Length<br>(bp) | Copy number | 5'–3' motif sequence   |
|------|----------|------|----------------|-------------|------------------------|
|      | From     | To   |                |             |                        |
| TR1  | 249      | 289  | 18             | 2.3         | TAATATAATAAATTAATA     |
| TR2  | 344      | 658  | 22             | 14.9        | ATATATATATAATAAATATAAT |
| TR3  | 763      | 799  | 19             | 2.1         | ATAAATATAATAAATTAAT    |
| TR4  | 857      | 910  | 9              | 6.2         | TAAATATAA              |
| TR5  | 1407     | 1451 | 17             | 2.6         | TTATCAATAAACTAATA      |

(5) *Sahlbergotettix salicicola*

| Unit | Position |     | Length<br>(bp) | Copy number | 5'–3' motif sequence                                 |
|------|----------|-----|----------------|-------------|------------------------------------------------------|
|      | From     | To  |                |             |                                                      |
| TR1  | 63       | 241 | 51             | 3.5         | ACTCAATAAAATTTTATTGAAATAAGAAATAGTAACTAATAAGGCAAACATC |
| TR2  | 248      | 327 | 28             | 2.9         | ATTAATATATATATATTTATATATTATA                         |

(6) *Podulmorinus consimilis*

| Unit | Position |     | Length<br>(bp) | Copy number | 5'–3' motif sequence |
|------|----------|-----|----------------|-------------|----------------------|
|      | From     | To  |                |             |                      |
| TR1  | 245      | 320 | 15             | 5.1         | ATTAATTATATATTT      |
| TR2  | 389      | 424 | 15             | 2.4         | ATTAATTATATATTT      |

(7) *Koreocerus koreanus*

| Unit | Position |      | Length<br>(bp) | Copy number | 5'–3' motif sequence                                                                                                                                                                                          |
|------|----------|------|----------------|-------------|---------------------------------------------------------------------------------------------------------------------------------------------------------------------------------------------------------------|
|      | From     | To   |                |             |                                                                                                                                                                                                               |
| TR1  | 360      | 868  | 205            | 2.4         | AAATAAAATCATAGTATTTATATCCATTTAATTAGGGGTAAATAGAGATAAATAATAA<br>ATTTTATAGTTCATTAAGTTAATTTAACTATTCAATTTAATTGTATAATTTATTATTGAT<br>TTAAGATTAGAATGTAAATTATTTAACTATATAATCCTACAAACCTATTTGTTATTAAAA<br>CTAAAAGAGGTTTGT |
| TR2  | 1148     | 1203 | 28             | 2.0         | ATATTATAATTAGTATATAATAATTATT                                                                                                                                                                                  |

(8) *Metidiocerus impressifrons*

| Unit | Position |      | Length<br>(bp) | Copy number | 5'–3' motif sequence |
|------|----------|------|----------------|-------------|----------------------|
|      | From     | To   |                |             |                      |
| TR1  | 311      | 370  | 14             | 4.4         | TATTAATATATATA       |
| TR2  | 425      | 484  | 14             | 4.4         | TATTAATATATATA       |
| TR3  | 539      | 598  | 14             | 4.4         | TATTAATATATATA       |
| TR4  | 653      | 712  | 14             | 4.4         | TATTAATATATATA       |
| TR5  | 767      | 826  | 14             | 4.4         | TATTAATATATATA       |
| TR6  | 881      | 940  | 14             | 4.4         | TATTAATATATATA       |
| TR7  | 995      | 1054 | 14             | 4.4         | TATTAATATATATA       |
| TR8  | 1109     | 1168 | 14             | 4.4         | TATTAATATATATA       |
| TR9  | 1223     | 1282 | 14             | 4.4         | TATTAATATATATA       |
| TR10 | 1337     | 1396 | 14             | 4.4         | TATTAATATATATA       |
| TR11 | 1451     | 1510 | 14             | 4.4         | TATTAATATATATA       |
| TR12 | 1565     | 1624 | 14             | 4.4         | TATTAATATATATA       |
| TR13 | 1679     | 1738 | 14             | 4.4         | TATTAATATATATA       |
| TR14 | 1793     | 1852 | 14             | 4.4         | TATTAATATATATA       |
| TR15 | 1904     | 1969 | 15             | 4.7         | TATTAATTATATATA      |

(9) *Idioscopus* sp.

| Unit | Position |     | Length<br>(bp) | Copy number | 5'–3' motif sequence                                                                                                                                                                                            |
|------|----------|-----|----------------|-------------|-----------------------------------------------------------------------------------------------------------------------------------------------------------------------------------------------------------------|
|      | From     | To  |                |             |                                                                                                                                                                                                                 |
| TR1  | 50       | 648 | 218            | 2.7         | TCAAATTAAGGTTATGTTAAAAATTAAGTATAAACTGTAAGTAGATACACTATACTCCTAC<br>AAACCTCTTTTTTACTTAAATTTAAAGAGGTTTGTATATTTTATAGTTAAATGAACTTAAT<br>ATTAACTTAATTAGGGGTAAAGAATAATATTAAATATGTAGAATAACTATAATATACC<br>CCCTTTTATATCTAA |
| TR2  | 805      | 870 | 18             | 3.8         | TTATTTTATTATATTAAT                                                                                                                                                                                              |

(10) *Idioscopus nitidulus*

| Unit | Position |     | Length<br>(bp) | Copy number | 5'–3' motif sequence    |
|------|----------|-----|----------------|-------------|-------------------------|
|      | From     | To  |                |             |                         |
| TR1  | 667      | 734 | 23             | 3.1         | AATAATAATTATAATTATATATA |

(11) *Idioscopus clypealis*

| Unit | Position |     | Length<br>(bp) | Copy number | 5'–3' motif sequence                                                                                                                                                   |
|------|----------|-----|----------------|-------------|------------------------------------------------------------------------------------------------------------------------------------------------------------------------|
|      | From     | To  |                |             |                                                                                                                                                                        |
| TR1  | 35       | 673 | 152            | 4.2         | TACTTTAATTAGGGGTAAAGTATAAAATTCTTCTTAATTAAGATAGTTATATAAGTGTAAT<br>AGTA<br><br>GATAACTTTATAATTTACTCAAACCTCTTTTTTCTAACTAGAAAAGAGGTTGAATTAAA<br>GATTAAGATTAATTTAAGTAGGCTTA |

(12) *Idiocerus salicis*

| Unit | Position |      | Length<br>(bp) | Copy number | 5'–3' motif sequence                                                                                                                                |
|------|----------|------|----------------|-------------|-----------------------------------------------------------------------------------------------------------------------------------------------------|
|      | From     | To   |                |             |                                                                                                                                                     |
| TR1  | 203      | 1576 | 131            | 10.4        | TATTAACCTTTGACTTAAAGTGGATACATAAAGAATATCTATATAGAACTAATTTAGATG<br>TATAT<br>TGTTACCATATTAATAATTCAAATTTTAACTACTTATCTAATAATGGGAGAATAGTATTTA<br>AGTA<br>A |
| TR2  | 1675     | 1732 | 15             | 3.9         | GTATTTATTAATTAA                                                                                                                                     |
| TR3  | 1834     | 1882 | 23             | 2.1         | ATTATTATTAATTCATTTATTTT                                                                                                                             |

(13) *Idiocerus laurifoliae*

| Unit | Position |      | Length<br>(bp) | Copy number | 5'–3' motif sequence                                                                                |
|------|----------|------|----------------|-------------|-----------------------------------------------------------------------------------------------------|
|      | From     | To   |                |             |                                                                                                     |
| TR1  | 34       | 77   | 17             | 2.8         | TAATAAACTAAAATAC                                                                                    |
| TR2  | 141      | 181  | 20             | 2.1         | AAATAGAAATAGAATAACAA                                                                                |
| TR3  | 211      | 272  | 15             | 3.8         | TAAAATTAAATAAAT                                                                                     |
| TR4  | 363      | 619  | 81             | 3.2         | AAAATAGATAAGTACCAACTACTTAAATAGAAATGAATAACAAAAATAGTAATAATAG<br>GTCAATTCAACTAACTCCATAG                |
| TR5  | 662      | 1121 | 91             | 5.1         | TAATAAAATTAGATTTATTAAGTATTATTTGTTATATCTTAAATATTAGTTATTTAAATA<br>AACTT<br>AATTAGGGGTAAAGTTATATATTAAC |
| TR6  | 1479     | 1707 | 41             | 5.1         | ATATTAGTTATTTAAATAAACTTAATTAGGGGTAAAGTTAT                                                           |
| TR7  | 2079     | 2109 | 15             | 2.0         | TATTTATTTATATAT                                                                                     |
| TR8  | 2160     | 2292 | 13             | 9.8         | TTATTTATATTAT                                                                                       |
| TR9  | 2334     | 2394 | 4.0            | 15          | TTATTATATATTATT                                                                                     |

(14) *Populicerus populi*

| Unit | Position |      | Length<br>(bp) | Copy number | 5'–3' motif sequence                                                                      |
|------|----------|------|----------------|-------------|-------------------------------------------------------------------------------------------|
|      | From     | To   |                |             |                                                                                           |
| TR1  | 59       | 465  | 80             | 5.1         | AATTTAAAATAATTAACTTAGTAGGGATTAAGGAATTATAAATTTATGAAATGAATGG<br>TTACTA                      |
| TR2  | 593      | 973  | 80             | 4.8         | ACTAATTGAATTTCT<br>ACTAAGCAATTATAAAATTTATGAAATGAATGGTTACTAACTAATTGAATTTCTAATTTA<br>AAATAA |
| TR3  | 1101     | 1408 | 80             | 3.8         | TTTAACTTAGTAGGG<br>ACTAAGCAATTATAAAATTTATGAAATGAATGGTTACTAACTAATTGAATTTCTAATTTA<br>AAATAA |
| TR4  | 1985     | 2047 | 22             | 2.9         | TTTAACTTAGTAGGG<br>TTATTATTAATATTTATATGTA                                                 |
