# Supplementary material for: Complete Mitogenome Analysis of Five Leafhopper Species of Idiocerini (Hemiptera: Cicadellidae)
Source: MDPI journal article supplement (doi:10.3390/genes13112000), 2022-11-01
Supplement: s1 [file s1]

**Table S1.** Organization of mitochondrial genomes of the tribe Idiocerini

| Name                                                                                                                                                 | Direction | Location                                                    | Size(bp)                     | Start               | Stop                | Anticodon                                        | IN             |
|------------------------------------------------------------------------------------------------------------------------------------------------------|-----------|-------------------------------------------------------------|------------------------------|---------------------|---------------------|--------------------------------------------------|----------------|
| <i>Nabicerus dentimus</i> / <i>Neoamritatus</i> sp./ <i>Sahlbergotettix salicicola</i> / <i>Podulmorinus opacus</i> / <i>Podulmorinus consimilis</i> |           |                                                             |                              |                     |                     |                                                  |                |
| <i>tRNA-I</i>                                                                                                                                        | F/F/F/F/F | 1-65/1-65/1-65/1-65                                         | 65/65/65/65/65               |                     |                     | GAT/31-33GAT/31-33GAT/31-33GAT/31-33GAT          | -2/-2/-2/-2/-2 |
| <i>tRNA-Q</i>                                                                                                                                        | R/R/R/R/R | 63-130/63-131/63-131/63-131/63-131                          | 68/69/69/69/69               |                     |                     | TTG/99-101TTG/99-101TTG/93-95TTG/99-101TTG       | 3/6/3/-1/-1    |
| <i>tRNA-M</i>                                                                                                                                        | F/F/F/F/F | 134-201/138-205/135-204/131-198                             | 68/68/70/69/68               |                     |                     | CAT/168-170CAT/167-169CAT/161-163CAT/161-163CAT  | 0/0/0/0/0      |
| <i>nad2</i>                                                                                                                                          | F/F/F/F/F | 202-1,176/206-1,180/205-1,179/99-1,173/199-1,173            | 975/975/975/975/975          | ATT/ATT/ATT/ATC/ATC | TAA/TAA/TAA/TAA/TAA |                                                  | -1/2/-1/-1/-1  |
| <i>tRNA-W</i>                                                                                                                                        | F/F/F/F/F | 1,175-1,242/1,183-1,247/1,178-1,245/1,172-1,239/1172-1237   | 68/65/68/68/66               |                     |                     | TCA/1,213-1,215TCA/1,210-1212TCA/1,203-1,205TCA  | -7/-7/-7/-7/-7 |
| <i>tRNA-C</i>                                                                                                                                        | F/F/F/F/F | 1,235-1,297/1,240-1,302/1,238-1,300/1,232-1,298/1,230-1,296 | 63/63/63/67/67               |                     |                     | GCA/1,270-1,272GCA/1,268-1,270GCA/1,264-1,266GCA | 7/4/2/7/7      |
| <i>tRNA-Y</i>                                                                                                                                        | F/F/F/F/F | 1,305-1,372/1,307-1,373/1,303-1,368/1,306-1,372/1,304-1,370 | 68/67/66/67/67               |                     |                     | GTA/1,339-1,341GTA/1,334-1,336GTA/1,339-1,341GTA | 11/7/12/7/7    |
| <i>cox1</i>                                                                                                                                          | F/F/F/F/F | 1,384-2,918/1,381-2,916/1,381-2,888/1,380-2,915/1,378-2,912 | 1,535/1,536/1,508/1,536/1536 | ATG/ATG/ATG/ATG/ATG | TA-/TAA/TA-/TAA/TA- |                                                  | 0/0/27/3/0     |

|                |           |                                                             |                     |                     |                          |                                                                 |               |
|----------------|-----------|-------------------------------------------------------------|---------------------|---------------------|--------------------------|-----------------------------------------------------------------|---------------|
| <i>tRNA-L2</i> | F/F/F/F/F | 2,919-2,985/2,917-2,982/2,916-2,980/2,919-2,985/2,913-2,979 | 67/66/66/67/67      |                     |                          | TAA/2,946-2,948TAA/2,945-2,947TAA/2,948-2,950TAA/2,942-2,944TAA | 0/0/0/0/0     |
| <i>cox2</i>    | F/F/F/F/F | 2,986-3,661/2,983-3,661/2,981-3,659/2,986-3,664/2,908-3,658 | 676/679/679/679/679 | ATT/ATC/ATT/ATT/ATT | T--/ T--/T--/<br>T--/T-- |                                                                 | 3/0/0/0/0     |
| <i>tRNA-K</i>  | F/F/F/F/F | 3,665-3,735/3,662-3,733/3,660-3,730/3,665-3,735/3,659-3,729 | 71/72/71/71/71      |                     |                          | CTT/3,693-3,695CTT/3,691-3,693CTT/3,696-3,698CTT/3,690,3,692CTT | 0/0/0/0/0     |
| <i>tRNA-D</i>  | F/F/F/F/F | 3,736-3,799/3,734-3,799/3,731-3,795/3,736-3,802/3,730-3,794 | 64/66/65/67/65      |                     |                          | GTC/3,767-3,769GTC/3,762-3,764GTC/3,766-3,768GTC/3,760-3,762GTC | 0/-1/0/0/0    |
| <i>atp8</i>    | F/F/F/F/F | 3,800-3,952/3,799-3,951/3,796-3,948/3,803-3,955/3,795-3,947 | 153/153/153/153/153 | TTG/TTG/TTG/TTG     | TAA/TAA/TAA/TAA/TAA      |                                                                 | -3/-3/-3/-6-6 |
| <i>atp6</i>    | F/F/F/F/F | 3,949-4,602/3,948-4,601/3,945-4,598/3,949-4,605/3,941-4,597 | 654/654/654/657/657 | ATA/TAA/ATA/ATG/ATG | TAA/TAA/TAA/TAA/TAA      |                                                                 | 1/0/5/1/1     |
| <i>cox3</i>    | F/F/F/F/F | 4,604-5,383/4,602-5,379/4,604-5,383/4,607-5,386/4,599-5,378 | 780/778/780/780/780 | ATG/ATG/ATG/ATG/ATG | TAA/T--/TAA/TAA/TAA      |                                                                 | 4/3/-1/0/-1   |
| <i>tRNA-G</i>  | F/F/F/F/F | 5,388-5,452/5,383-5,446/5,383-5,447/5,386-5,449/5,378-5,441 | 65/64/65/64/64      |                     |                          | TCC/5,413-5,415TCC/5,413-5,415TCC/5,416-5,418TCC/5,408-5,410TCC | 0/0/0/0/0     |

|                |           |                                                             |                                   |                         |                                                                 |                     |
|----------------|-----------|-------------------------------------------------------------|-----------------------------------|-------------------------|-----------------------------------------------------------------|---------------------|
| <i>nad3</i>    | F/F/F/F/F | 5,453-5,806/5,447-5,800/5,448-5,801/5,450-5,803/5,442-5,795 | 354/354/354/354/<br>354           | ATT/ATA/ATC<br>/ATT/ATT | TAA/TAA/TAG/<br>TAA/TAA                                         | -1/7/-1/-1/-1       |
| <i>tRNA-A</i>  | F/F/F/F/F | 5,806-5,867/5,808-5,871/5,800-5,862/5,803-5,864/5,795-5,856 | 62/64/63/62/62                    |                         | TGC/5,837-5,839TGC/5,829-5,831TGC/5,833-5,835TGC/5,824-5,826TGC | 0/-1/0/5/5          |
| <i>tRNA-R</i>  | F/F/F/F/F | 5,868-5,930/5,871-5,936/5,863-5,923/5,870-5,932/5,862-5,926 | 63/66/61/63/65                    |                         | TCG/5,899-5,901TCG/5,890-5,892TCG/5,898-5,900TCG/5,890-5,892TCG | 0/-1/0/-1/-1        |
| <i>tRNA-N</i>  | F/F/F/F/F | 5,931-5,997/5,936-6,002/5,924-5,989/5,932-5,997/5,926-5,991 | 67/67/66/66/66                    |                         | GTT/5,967-5,969GTT/5,954-5,956GTT/5,962-5,964GTT/5,956-5,958GTT | -1/-1/-1//1/-1<br>1 |
| <i>tRNA-S1</i> | F/F/F/F/F | 5,997-6,062/6,002-6,067/5,989-6,054/5,997-6,062/5,991-6,056 | 66/66/66/66/66                    |                         | GCT/6,026-6,028GCT/6,013-6,015GCT/6,021-6,023GCT/6,015-6,017GCT | 4/4/1/0/0           |
| <i>tRNA-E</i>  | F/F/F/F/F | 6,067-6,133/6,072-6,137/6,056-6,121/6,063-6,128/6,057-6,121 | 67/66/66/66/65                    |                         | TTC/6,104-6,106TTC/6,085-6,087TTC/6,093-6,095TTC/6,087-6,089TTC | 0/1/3/-1/-1         |
| <i>tRNA-F</i>  | R/R/R/R/R | 6,132-6,193/6,139-6,203/6,125-6,187/6,128-6,190/6,121-6,183 | 62/65/63/63/63                    |                         | GAA/6,168-6,170GAA/6,155-6,157GAA/6,157-6,159GAA/6,150-6,152    | 0/0/0/0/0           |
| <i>nad5</i>    | R/R/R/R/R | 6,194-7,865/6,204-7,875/6,188-7,859/6,191-7,862/6,184-7,855 | 1,672/1,672/1,672<br>/1,672/1,672 | TTG/ATG/TTG/<br>TTG/TTG | T--/T--/T--/T--/<br>T--                                         | 0/1/0/0/0           |

|                |           |                                                                       |                               |                     |                     |                                                                         |               |
|----------------|-----------|-----------------------------------------------------------------------|-------------------------------|---------------------|---------------------|-------------------------------------------------------------------------|---------------|
| <i>tRNA-H</i>  | R/R/R/R/R | 7,866-7,929/7,877-7,946/7,860-7,922/7,863-7,927/7,856-7,918           | 64/70/63/65/63                |                     |                     | GTG/7,912-7,914GTG/7,889-7,891GTG/7,894-7,896GTG/7,885-7,887GTG         | -1/9/0/-1/-1  |
| <i>nad4</i>    | R/R/R/R/R | 7,928-9,241/7,956-9,258/7,923-9,231/7,927-9,228/7,918-9,219           | 1,314/1,303/1,309/1,302/1,302 | ATT/ATA/ATT/ATA/ATA | TAA/T--/T--/TAA/TAA |                                                                         | -12/-3/-12/-1 |
| <i>nad4l</i>   | R/R/R/R/R | 9,229-9,507/9,255-9,533/9,219-9,497/9,228-9,506/9,219-9,497           | 279/279/279/279/279           | ATG/ATG/ATG/ATA/ATG | TAA/TAA/TAA/TAA/TAA |                                                                         | 2/2/2/2/2     |
| <i>tRNA-T</i>  | F/F/F/F/F | 9,510-9,572/9,536-9,600/9,500-9,563/9,509-9,572/9,500-9,563           | 63/65/64/64/64                |                     |                     | TGT/9,566-9,568TGT/9,530-9,532TGT/9,539-9,541TGT/9,630-9,532TGT         | 0/0/0/0/0     |
| <i>tRNA-P</i>  | R/R/R/R/R | 9,573-9,636/9,601-9,663/9,564-9,626/9,573-9,636/9,564-9,627           | 64/63/63/64/64                |                     |                     | TGG/9,630-9,632TGG/9,634-9,636TGG/9,504-9,506TGG/9,596-9,598TGG         | 2/2/2/2/2     |
| <i>nad6</i>    | F/F/F/F/F | 9,639-10,124/9,666-10,151/9,629-10,114/9,639-10,124/9,630-10,115      | 486/486/486/486/486           | ATC/ATA/ATC/ATT/ATT | TAA/TAA/TAA/TAA/TAA |                                                                         | 1/-1/-1/-1/-1 |
| <i>cob</i>     | F/F/F/F/F | 10,124-11,260/10,151-11,287/10,114-11,250/10,124-11,263/10,115-11,254 | 1,137/1,137/1,137/1,137/1,140 | ATG/ATG/ATG/ATG/ATG | TAA/TAA/TAA/TAA/TAA |                                                                         | -1/3/3// -1-1 |
| <i>tRNA-S2</i> | F/F/F/F/F | 11,260-11,324/11,291-11,355/11,254-11,318/11,263-11,326/11,254-11,317 | 65/65/65/64/64                |                     |                     | TGA/11,323-11,325TGA/11,286-11,288TGA/11,294-11,296TGA/11,283-11,285TGA | 1/2/2/1/1     |

|                 |           |                                                                               |                                   |                         |                                                                             |                         |
|-----------------|-----------|-------------------------------------------------------------------------------|-----------------------------------|-------------------------|-----------------------------------------------------------------------------|-------------------------|
| <i>nad1</i>     | R/R/R/R/R | 11,326-12,256/11,358-12,288/11,<br>321-12,251/11,328-12,259/11,319<br>-12,250 | 931/931/931/932/<br>932           | ATG/ATT/ATT/<br>ATT/ATT | T--/ T--/<br>T--/TA-/TA-                                                    | 0/0/0/0/0               |
| <i>tRNA-L1</i>  | R/R/R/R/R | 12,257-12,320/12,289-12,353/12,<br>252-12,315/12,206-12,323/12,251<br>-12,314 | 64/65/64/64/64                    |                         | TAG/12,322-12,324TAG/12,284-12,286TAG/12,292-12,<br>294TAG/12,281-12,283TAG | -16/5/17/-1/8<br>1      |
| <i>16S rRNA</i> | R/R/R/R/R | 12,304-13,346/12,367-13,305/12,<br>323-13,334/12,323-13,334/12,396<br>-13,534 | 1,043/1,203/1,012<br>/1,203/1,239 |                         |                                                                             | 174/252/169/<br>192/-14 |
| <i>tRNA-V</i>   | R/R/R/R/R | 13,521-13,587/13,558-13,628/13,<br>504-13,569/13,527-13,595/13,520<br>-13,586 | 67/67/66/68/67                    |                         | TAC/13,593-13,594TAC/13,535-13,537TAC/13,559-1<br>3,561TAC/13,552-13,554TAC | 0/0/3/-22/0             |
| <i>12S rRNA</i> | R/R/R/R/R | 13,588-14,339/13,629-14,372/13,<br>573-14,314/13,573-14,314/15,587<br>-14,328 | 752/754/741/754/<br>742           |                         |                                                                             | 0/0/0/0/0               |
| CR              |           | 14,340-14,815/14,373-15,044/14,<br>315-14,733/14,315-14,815/14,329<br>-14,825 | 476/672/419/501/<br>497           |                         |                                                                             |                         |
