# Supplementary figures and images for: Complete Mitogenome Analysis of Five Leafhopper Species of Idiocerini (Hemiptera: Cicadellidae)
Source: MDPI journal article supplement (doi:10.3390/genes13112000), 2022-11-01

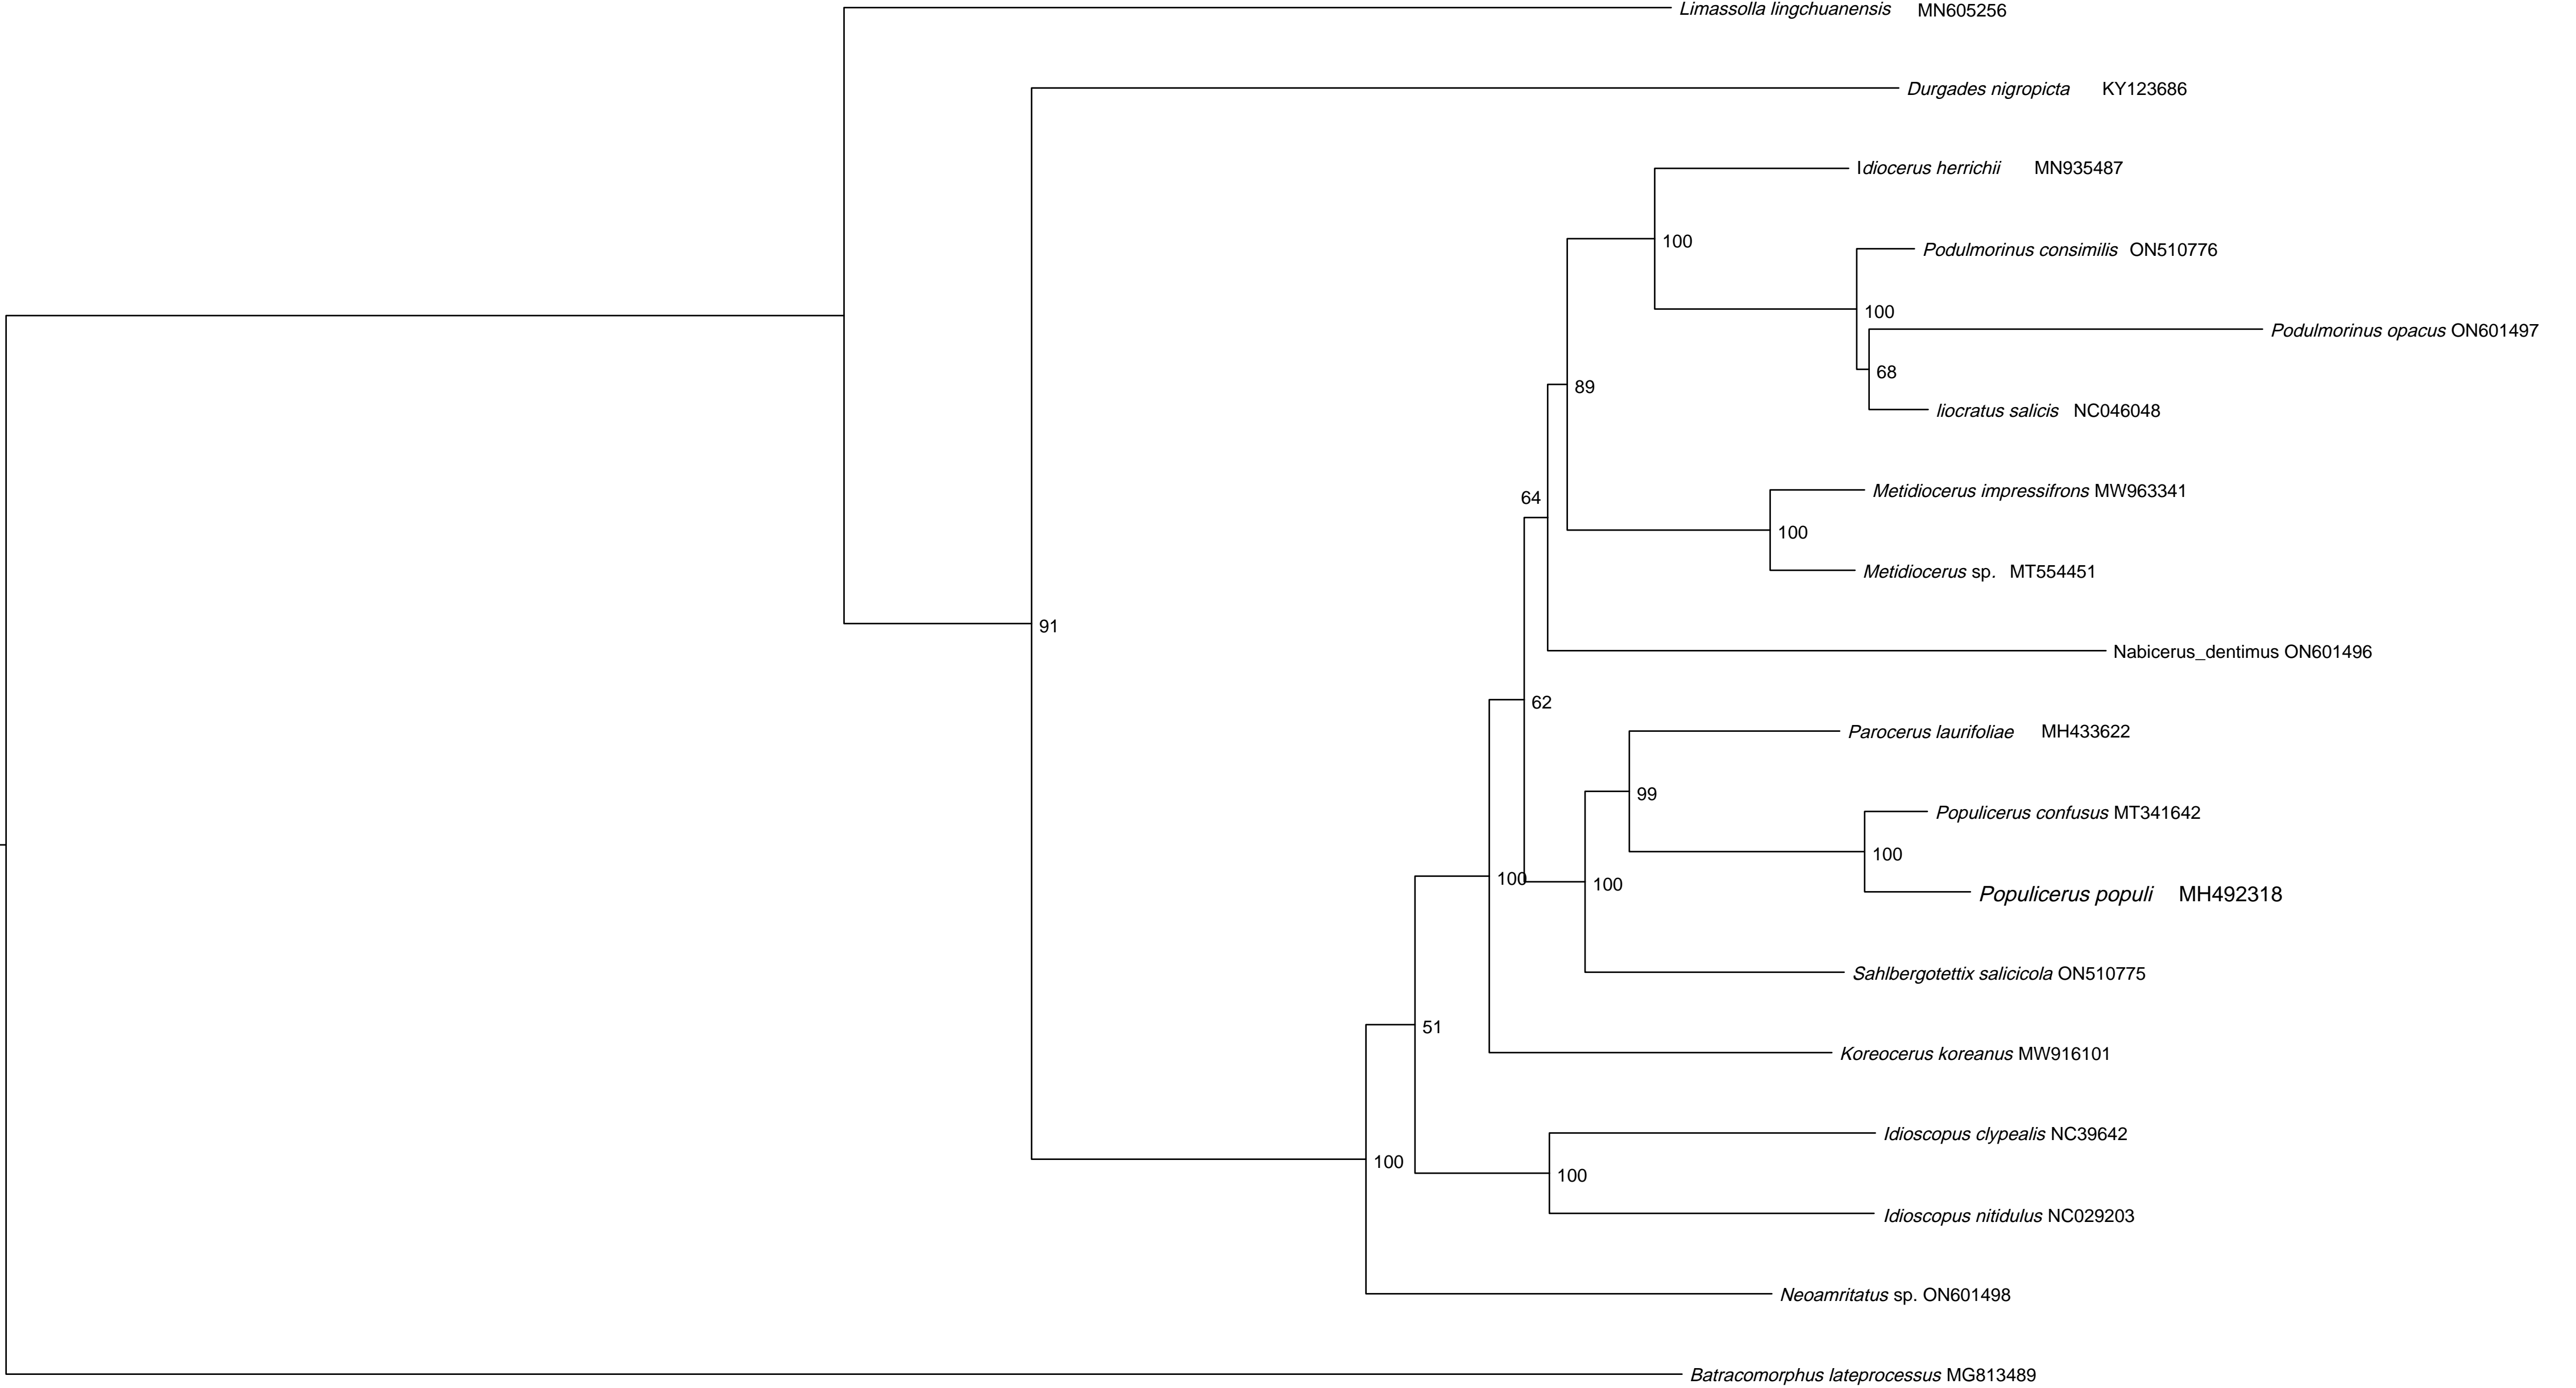

Supplement: s1 [file s1]
